# Supplementary material for: Subcellular Localization of Acyl-CoA: Lysophosphatidylethanolamine Acyltransferases (LPEATs) and the Effects of Knocking-Out and Overexpression of Their Genes on Autophagy Markers Level and Life Span of A. thaliana
Source: PubMed Central journal article supplement (PMC8000221; doi:10.3390/ijms22063006), 2021-03-16
Supplement: ijms-22-03006-s001.pdf [file ijms-22-03006-s001.pdf]

**Subcellular localization of acyl-CoA:lysophosphatidylethanolamine acyltransferases (LPEATs) and the effects of knocking-out and overexpression of their genes on autophagy markers level and life span of *A. thaliana***

Katarzyna Jasieniecka-Gazarkiewicz<sup>1\*</sup>, Kamil Demski<sup>1</sup>, Satinder K. Gidda<sup>2</sup>, Sylwia Klińska<sup>1</sup>, Janusz Niedojadło<sup>3</sup>, Ida Lager<sup>4</sup>, Anders S. Carlsson<sup>4</sup>, Elena A. Minina<sup>5</sup>, Robert T. Mullen<sup>2</sup>, Peter V. Bozhkov<sup>5</sup>, Sten Stymne<sup>4</sup> and Antoni Banaś<sup>1</sup>

**Supplementary materials**

**Table S1.** List of primers used in the study

| Primer name       | 5' primer sequence 3'                                      |
|-------------------|------------------------------------------------------------|
| AtLPEAT1f         | GGGGACAAGTTTGTACAAAAAAGCAGGCTTCGAATCAGAGCTCAAA<br>GA       |
| AtLPEAT1r         | GGGGACCACTTTGTACAAGAAAGCTGGGTCTCATTCTTCTTTCTGAT<br>GGAAATC |
| AtLPEAT2f         | GGGGACAAGTTTGTACAAAAAAGCAGGCTTCGCGGATCCTGATCTG<br>TCTTCT   |
| AtLPEAT2r         | GGGGACCACTTTGTACAAGAAAGCTGGGTCTTATGTTGGGGCCAAGT<br>CA      |
| EF1ALPHAf<br>qPCR | TGCTCTATGGAAGTTCGAGACC                                     |
| EF1ALPHAr<br>qPCR | GTGGCATCCATCTTGTTACAACA                                    |
| ACT2f qPCR        | TGGAATCCACGAGACAACCTA                                      |
| ACT2r qPCR        | TTCTGTGAACGATTCCTGGAC                                      |
| Atg8f qPCR        | ATGATCTTTGCTTGCTTGAAATTC                                   |
| Atg8r qPCR        | AGCCTTCTCCACAATCACG                                        |
| NBR1f qPCR        | TGATGAGGATGGGGATGTG                                        |
| NBR1r qPCR        | AGCAGCAGAGTTAGTGGAC                                        |

**Table S2.** Percentage of mesophyll cells containing different membrane structures in their vacuoles.

| Analyzed Arabidopsis line          | % of cells containing in vacuoles the following membrane structures: |     |                       |                                        |
|------------------------------------|----------------------------------------------------------------------|-----|-----------------------|----------------------------------------|
|                                    | MVS                                                                  | MLS | Degraded chloroplasts | Small single-membrane-bounded vesicles |
| WT                                 | 34                                                                   | 25  | 55                    | 67                                     |
| <i>lpeat1 lpeat2</i> double mutant | 12                                                                   | 15  | 42                    | 64                                     |

MVS – multivesicular structures; MLS - multilamellar structures; for analyses 30 cells of WT and 32 cells of *lpeat1 lpeat2* double mutant were used

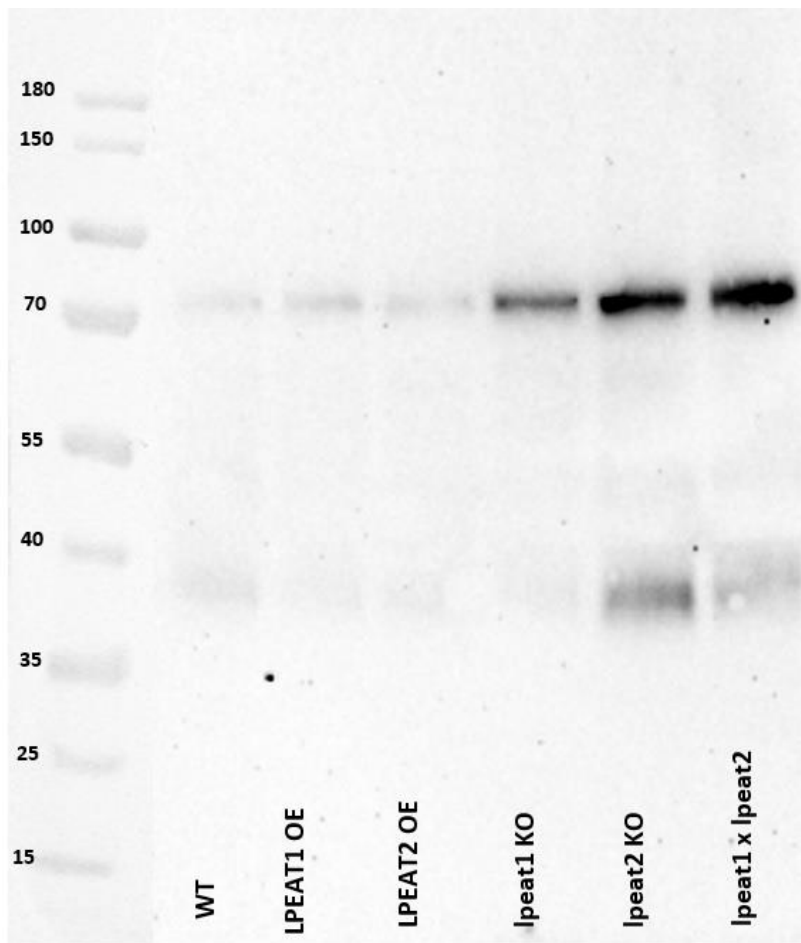

**Fig. S1.** Selected western blot analysis (complete membrane) of the total protein extracts from leaves (0 DAF) of wild-type plants of *Arabidopsis* (Col-0) – (WT) and plants of *lpeat1* mutant, *lpeat2* mutant and *lpeat1 lpeat2* double mutant as well as *LPEAT1* and *LPEAT2* overexpressors grown in soil under standard conditions. The blot was incubated with polyclonal antibodies against AtNBR1 protein. Equal amounts of protein (30  $\mu$ g) were loaded and separated on the NuPAGE 4-12% Bis-Tris-Gel. The ladder with pre-stained protein standards came from the same membrane which was used for incubation with antibodies. Photo of the ladder was combined with the blot.

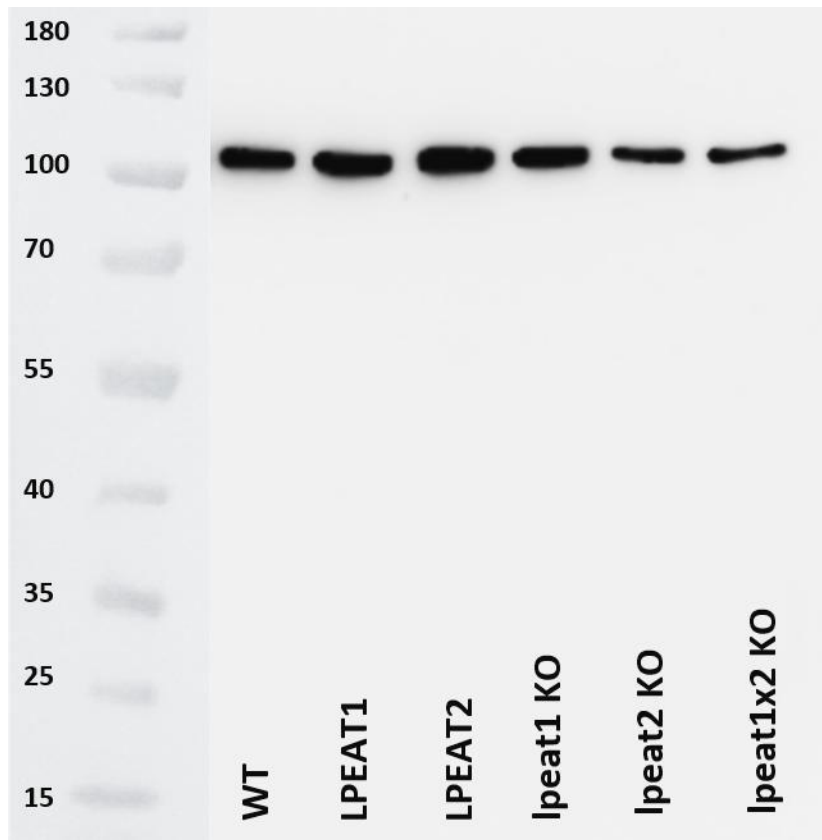

**Fig. S2.** Selected immunoblot analysis (complete membrane) of the total protein extracted from leaves (0 DAF) of wild type plants of Arabidopsis (Col-0) (WT), *lpeat1* mutant, *lpeat2* mutant and *lpeat1 lpeat2* double mutant as well as *LPEAT1* and *LPEAT2* overexpressors. The blot was incubated with polyclonal antibodies (abcam) against ATG8a protein. Equal amounts of protein (10  $\mu$ g) were loaded and separated on the NuPAGE 4-12% Bis-Tris-Gel. The ladder with pre-stained protein standards came from the same membrane which was used for incubation with antibodies. Photo of the ladder was combined with the blot.

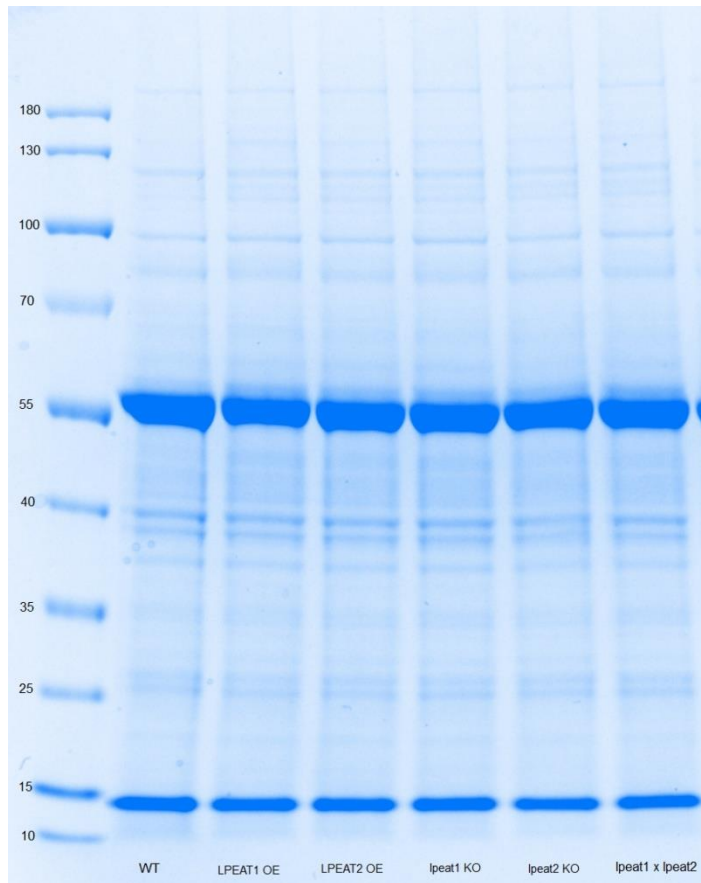

**Fig. S3.** Total protein extracted from leaves (0 DAF) of wild type plants of Arabidopsis (Col-0) - (WT), *lpeat1* mutant, *lpeat2* mutant and *lpeat1 lpeat2* double mutant as well as *LPEAT1* and *LPEAT2* overexpressors separated on the NuPAGE 4-12% Bis-Tris-Gel. On the gel equal amounts of protein (10  $\mu$ g) were loaded. The proteins were stained with “commasie brillant blue”.

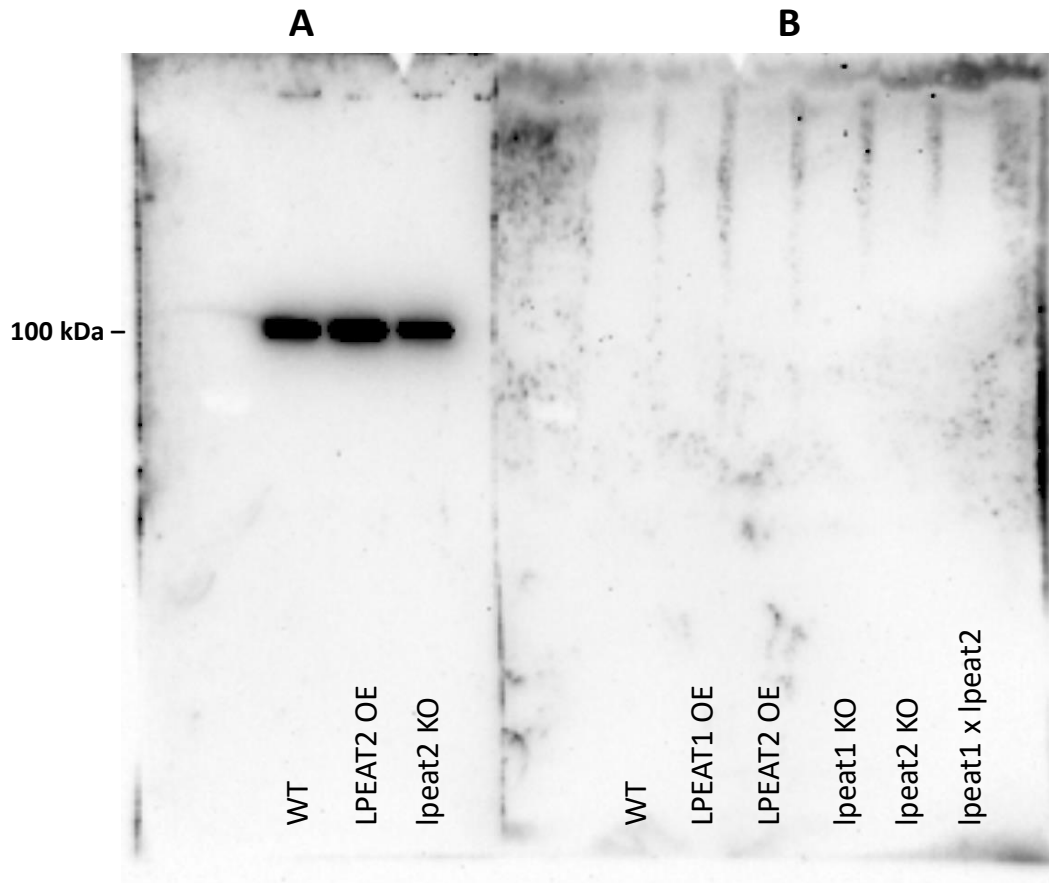

**Fig. S4.** Immunoblot analysis of the total protein extracted from leaves (0 DAF) of wild type plants of Arabidopsis (Col-0) (WT), *lpeat1* mutant, *lpeat2* mutant and *lpeat1 lpeat2* double mutant as well as *LPEAT1* and *LPEAT2* overexpressors. The blot was cut for two parts and incubated with polyclonal antibodies against ATG8a protein; “part A” with antibodies from “abcam” and part B” with antibodies from “Agrisera”. On the gel: “part A” 10  $\mu$ g of protein/wells and in “part B” 40  $\mu$ g of protein/wells were loaded and separated. NuPAGE 4-12% Bis-Tris-Gel was used.

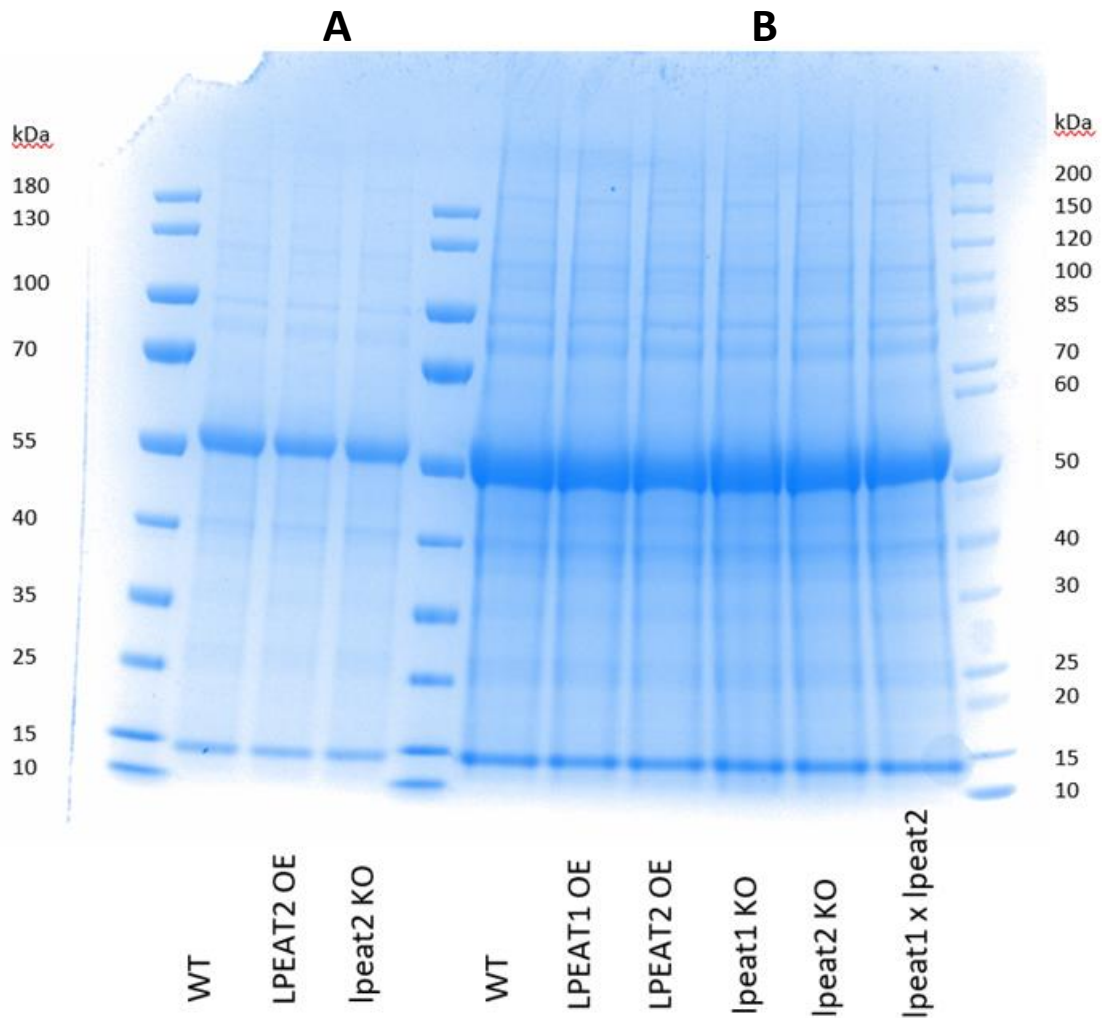

**Fig. S5.** Total protein extracted from leaves (0 DAF) of wild type plants of Arabidopsis (Col-0) - (WT), *lpeat1* mutant, *lpeat2* mutant and *lpeat1 lpeat2* double mutant as well as *LPEAT1* and *LPEAT2* overexpressors separated on the NuPAGE 4-12% Bis-Tris-Gel. On the gel: “part A” 10 µg of protein/wells and in “part B” 40 µg of protein/wells were loaded. The proteins were stained with “commasie brillant blue”.

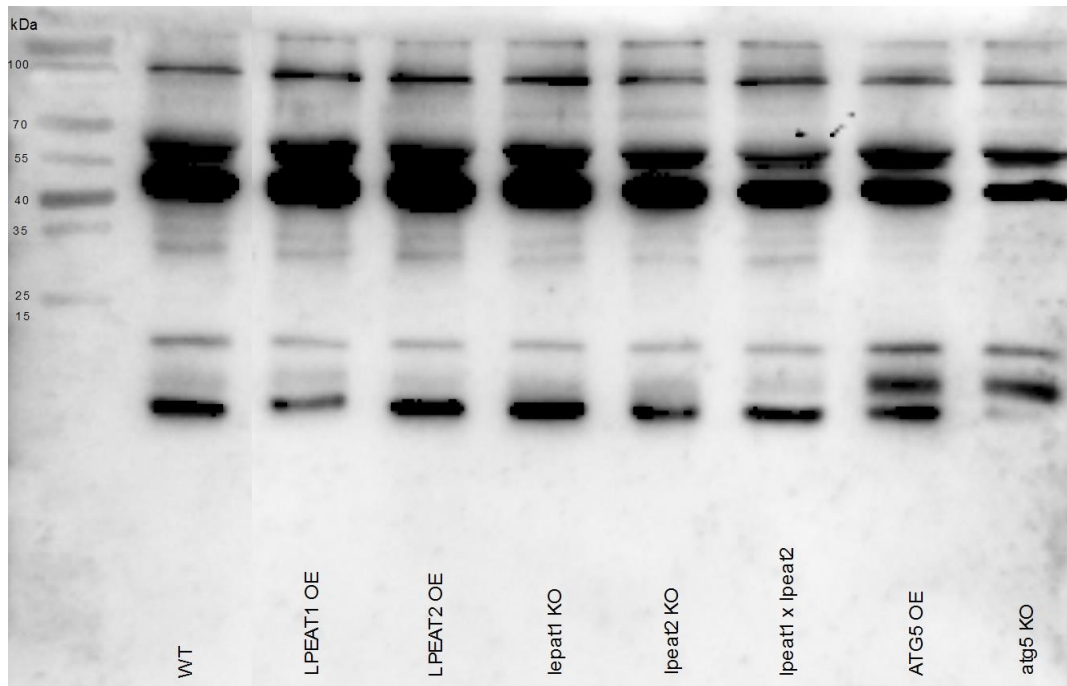

**Fig. S6.** Selected immunoblot analysis (complete membrane) of the total protein extracted from leaves (0 DAF) of wild type plants of Arabidopsis (Col-0) - (WT), *lpeat1* mutant, *lpeat2* mutant and *lpeat1 lpeat2* double mutant as well as *LPEAT1* and *LPEAT2* overexpressors. Additionally protein extracts from leaves of Arabidopsis *ATG5* OE and *atg5* mutant (0 DAF) were separated. The blot was incubated with polyclonal antibodies against ATG8a protein from “abcam”. Equal amounts of protein (10  $\mu$ g) were loaded and separated on the urea gel. All wells came from the same blot; one well between WT and *LPEAT1* overexpressors was cut off.



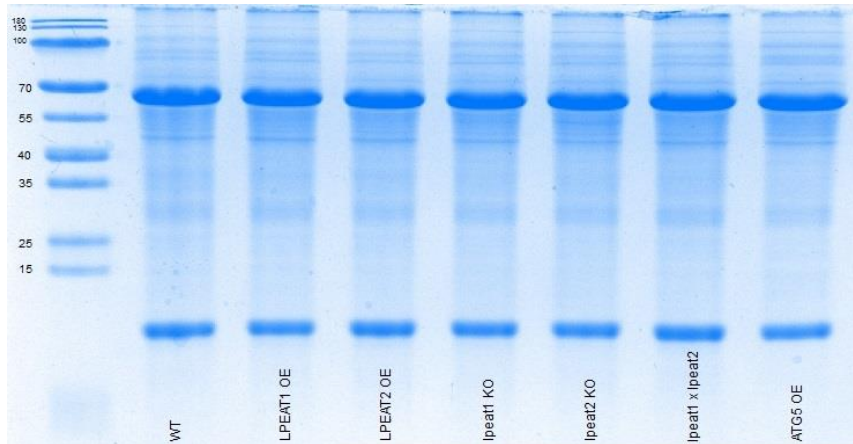

**Fig. S7.** Total protein extracted from leaves (0 DAF) of wild type plants of Arabidopsis (Col-0) - (WT), *lpeat1* mutant, *lpeat2* mutant and *lpeat1 lpeat2* double mutant as well as *LPEAT1* and *LPEAT2* overexpressors separated on the urea gel. Additionally protein extracts of Arabidopsis *ATG5* OE (0 DAF) were separated. On the gel equal amounts of protein (10  $\mu$ g) were loaded. The proteins were stained with “commasie brillant blue”.

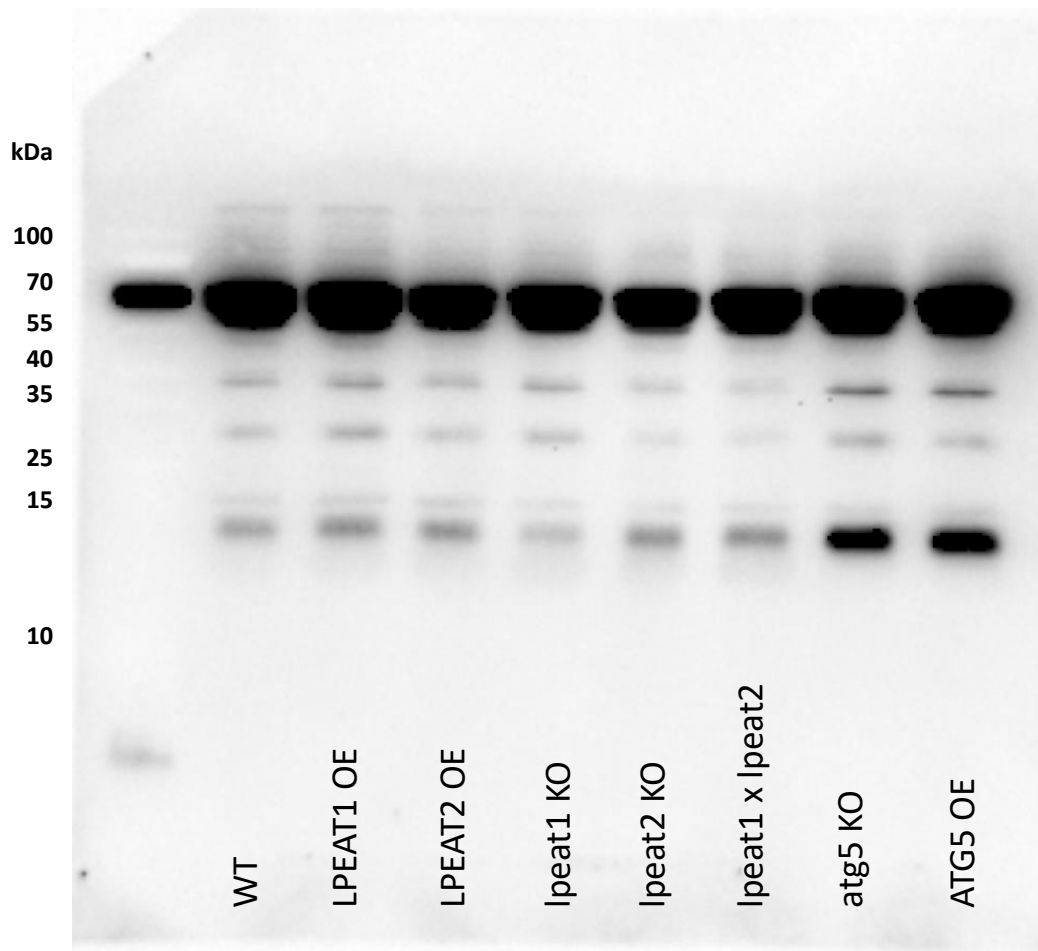

**Fig. S8.** Immunoblot analysis (complete membrane) of the total protein extracted from leaves (0 DAF) of wild type plants of *Arabidopsis* (Col-0) - (WT), *lpeat1* mutant, *lpeat2* mutant and *lpeat1 lpeat2* double mutant as well as *LPEAT1* and *LPEAT2* overexpressors. Additionally protein extracts from leaves of *Arabidopsis* *ATG5* OE and *atg5* mutant (0 DAF) were separated. The blot was incubated with polyclonal antibodies against ATG8a protein from “Agrisera”. Equal amounts of protein (15  $\mu$ g) were loaded and separated on the urea gel.

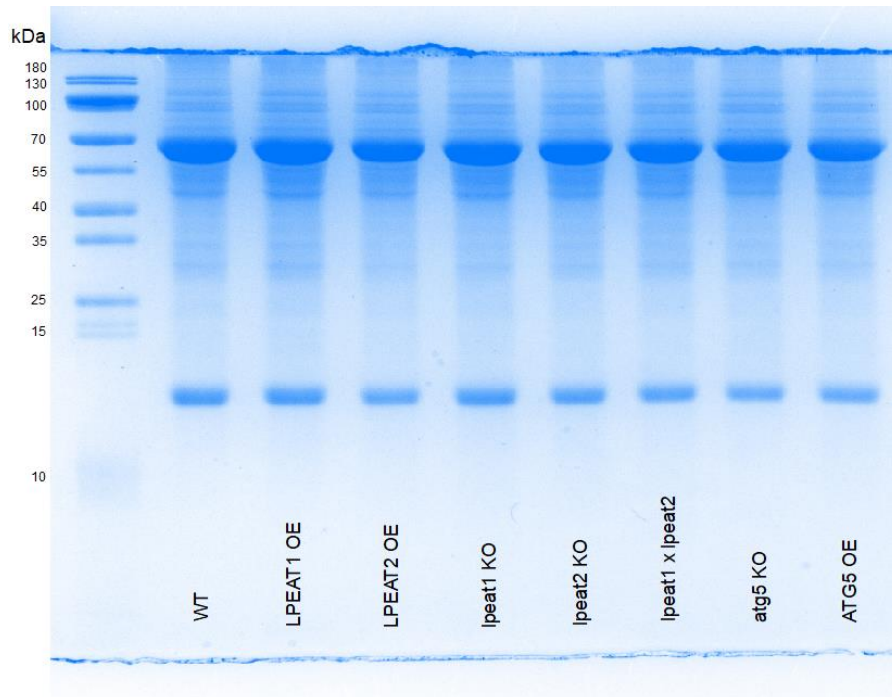

**Fig. S9.** Total protein extracted from leaves (0 DAF) of wild type plants of Arabidopsis (Col-0) - (WT), *lpeat1* mutant, *lpeat2* mutant and *lpeat1 lpeat2* double mutant as well as *LPEAT1* and *LPEAT2* overexpressors separated on the urea gel. Additionally protein extracts from leaves of Arabidopsis *ATG5* OE and *atg5* mutant (0 DAF) were separated. On the gel equal amounts of protein (15  $\mu$ g) were loaded. The proteins were stained with “commasie brillant blue”.
